# Supplementary material for: Dark-induced senescence of barley leaves involves activation of plastid transglutaminases
Source: PubMed Central journal article supplement (PMC4361728; doi:10.1007/s00726-014-1912-y), 2015-01-13

# Supplementary Text

## Computational identification of putative barley TGases

Coding sequences of putative barley TGase genes were searched for using Arabidopsis AtPng1p (Della Mea et al. 2004a) and maize TGZ15 and TGZ21 (Villalobos et al. 2004) protein sequences to query the public databases. One predicted barley protein has been identified (BAK01337.1, hereafter named HvPng1-like) as exhibiting a high degree of similarity to the AtPng1p reference protein sequence. The corresponding cDNA sequence was successfully verified by assembling it with eight ESTs from the NCBI UniGene Hv.16669 (Figure S1). HvPng1-like has a high level of similarity to multiple proteins from both monocots and dicots (Table S1), all of which possess a conserved core domain (pfam01841) and whose Cys-His-Asp residues form the catalytic triad, a characteristic of TGases (Figure S2). According to the TargetP1.1 Server search, none of these proteins possess a classical signal peptide capable of targeting it to any cellular compartment.

When the maize TGZ21 protein was used for the identification of barley homologs, four predicted proteins with partial homology were identified, BAJ92539.1 being the most similar. We refer to this putative protein as HvTGZ21-like, whose cDNA sequence has been confirmed by assembly with 18 other cDNAs/ESTs from the NCBI UniGene Hv.1565 (Figure S3). Interestingly, HvTGZ21-like shows a very high degree of similarity to TGZ21 at the N-terminus, but the C-termini of the two proteins are drastically different. A more detailed investigation revealed that although numerous monocot cDNA sequences are highly similar to the *TGZ15* and *TGZ21* cDNA sequences, these two maize cDNAs lack a conserved G in position 747, which results in a frame shift that extends the TGZ15/TGZ21 protein length, with respect to the other *Poaceae* sequences (Figures S4 and S5). According to Villalobos et al. (2004), the TGase catalytic triad in the TGZ15 and TGZ21 proteins is placed in this unique C-terminal region. As we did not find any proteins with similarity to this region in the databases nor did we observe the G deletion in any other maize DNA sequence (including genomic DNA; see Figure S6), we focused on the functional analysis of only the *HvPng1-like* gene.

Table S1. Plant proteins highly similar to barley HvPng1-like protein.

| Organism                               | NCBI accession  | Length        | Identities | Positives |
|----------------------------------------|-----------------|---------------|------------|-----------|
| <b><i>H. vulgare</i> (HvPng1-like)</b> | <b>BAK01337</b> | <b>777 aa</b> | -          | -         |
| <i>O. sativa</i>                       | EEC82091        | 802 aa        | 76 %       | 83 %      |
| <i>B. distachyon</i>                   | XP_003563069    | 719 aa        | 75 %       | 81 %      |
| <i>S. bicolor</i>                      | XP_002462888    | 727 aa        | 70 %       | 79 %      |
| <i>R. communis</i>                     | XP_002512221    | 719 aa        | 52 %       | 70 %      |
| <i>S. lycopersicum</i>                 | NP_001234560    | 725 aa        | 53 %       | 69 %      |
| <i>V. vinifera</i>                     | XP_002278422    | 726 aa        | 51 %       | 66 %      |
| <i>M. truncatula</i>                   | XP_003626428    | 719 aa        | 49 %       | 66 %      |
| <i>A. thaliana</i> (AtPng1p)           | NP_199768       | 721 aa        | 51 %       | 66 %      |

**Figure S1. CAP3 assembly of sequences from the UniGene Hv.16669.** Sequence AK370136 is a cDNA corresponding to HvPNG1-like protein, acc. no BAK01337.1. Coding sequence has been highlighted.

\*\*\*\*\* Contig 1 \*\*\*\*\*

12/gb=AK370136+  
           9/gb=FD519350- is in 12/gb=AK370136+  
           7/gb=BJ479950+ is in 12/gb=AK370136+  
           6/gb=BU970594+ is in 12/gb=AK370136+  
           3/gb=AV938210+ is in 12/gb=AK370136+  
           8/gb=BJ485214- is in 12/gb=AK370136+  
           2/gb=AV937315+ is in 12/gb=AK370136+  
           1/gb=AV835569- is in 12/gb=AK370136+  
 11/gb=GH218900-

DETAILED DISPLAY OF CONTIGS

\*\*\*\*\* Contig 1 \*\*\*\*\*

12/gb=AK370136+           GGCGACGTGGTCCACAGAGATAACGCTATGGTGGCTCGCAGGTTTCGTAGTCCGGCAGGCC  
 7/gb=BJ479950+                           ATAACGCTATGGTGGCTCGCAGGTTTCGTAGTCCGGCAGGCC  
 3/gb=AV938210+                                           CTATGGTGGCTCGCAGGTTTCGTAGTCCGGCAGGCC

consensus                                           GGCGACGTGGTCCACAGAGATAACGCTATGGTGGCTCGCAGGTTTCGTAGTCCGGCAGGCC

12/gb=AK370136+           TCCGCCGGCAGGAGACACGAGGTCGAGTACGACACGGACGCGGACTCGACGTCCTGCGC  
 7/gb=BJ479950+                           TCCGCCGGNGAGGAGCACGAGGTCGAGTACGACACGGACGCGGACTCGACGTCCTGCGC  
 3/gb=AV938210+                           TCCGCCGGCAGGAGACACGAGGTCGAGTACGACACGGACGCGGACTCGACGTCCTGCGC

consensus                                           TCCGCCGGCAGGAGACACGAGGTCGAGTACGACACGGACGCGGACTCGACGTCCTGCGC

12/gb=AK370136+           TTTCAGATCTTCTCGCTCACCTCCGTCCCACCCGACCTCCAGAAGATCGTAGTGGAAGCG  
 7/gb=BJ479950+                           TTTCAGATCTTCTCGCTCACCTCCGTCCCACCCGACCTCCAGAAGATCGTAGTGGAAGCG  
 3/gb=AV938210+                           TTTCAGATCTTCTCGCTCACCTCCGTCCCACCCGACCTCCAGAAGATCGTAGTGGAAGCG

consensus                                           TTTCAGATCTTCTCGCTCACCTCCGTCCCACCCGACCTCCAGAAGATCGTAGTGGAAGCG

12/gb=AK370136+           GATGGCTCCGTGGTTCGACGACGGCACAGGCCTCGAGTCAATTCGGATGGCTGTGCCTC  
 7/gb=BJ479950+                           GATGGCTCCGTGGTTCGACGACGGCACAGGCCTCGAGTCAATTCGGATGGCTGTGCCTC  
 3/gb=AV938210+                           GATGGCTCCGTGGTTCGACGACGGCACAGGCCTCGAGTCAATTCGGATGGCTGTGCCTC

consensus                                           GATGGCTCCGTGGTTCGACGACGGCACAGGCCTCGAGTCAATTCGGATGGCTGTGCCTC

12/gb=AK370136+           GTGTCTATTGACGAGGGGAGGACGCGGACGCGGCTTCGGCTTCGGCGACGGCGCAGGAG  
 7/gb=BJ479950+                           GTGTCTATTGACGAGGGGAGGACGCGGACGCGGCTTCGGCTTCGGCGACGGCGCAGGAG  
 3/gb=AV938210+                           GTGTCTATTGACGAGGGGAGGACGCGGACGCGGCTTCGGCTTCGGCGACGGCGCAGGAG

consensus                                           GTGTCTATTGACGAGGGGAGGACGCGGACGCGGCTTCGGCTTCGGCGACGGCGCAGGAG

12/gb=AK370136+           AAGTCCGACGAGGAACGAAGAGGTTGATTGAGATCGAGGTGGAGGCGGATGGCTCCGTG  
 7/gb=BJ479950+                           AAGTCCGACGAGGAACGAAGAGGTTGATTGAGATCGAGGTGGAGGCGGATGGCTCCGTG  
 3/gb=AV938210+                           AAGTCCGACGAGGAACGAAGAGGTTGATTGAGATCGAGGTGGAGGCGGATGGCTCCGTG  
 2/gb=AV937315+                                                                                           GGCTCCGTG

consensus                                           AAGTCCGACGAGGAACGAAGAGGTTGATTGAGATCGAGGTGGAGGCGGATGGCTCCGTG

12/gb=AK370136+           GTCGACGACGTCACCGACCTCAAGTCTATTTCCGAAGTCACCCGCCTCGTACCCATCGGC  
 7/gb=BJ479950+                           GTCGACGACGTCACCGACCTCAAGTCTATTTCCGAAGTCACCCGCCTCGTACCCATCGGC  
 3/gb=AV938210+                           GTCGACGACGTCACCGACCTCAAGTCTATTTCCGAAGTCACCCGCCTCGTACCCATCGGC  
 2/gb=AV937315+                           GTCGACGACGTCACCGACCTCAAGTCTATTTCCGAAGTCACCCGCCTCGTACCCATCGGC

consensus                                           GTCGACGACGTCACCGACCTCAAGTCTATTTCCGAAGTCACCCGCCTCGTACCCATCGGC

12/gb=AK370136+           GAGGGGGATGACGTGGACGCAGCGGCGGCTGCAGCTATGAGGGCGCAGGAGAAGTCCGAC  
 7/gb=BJ479950+                           GAGGGGGATGACGTGGACGCAGCGGCGGCTGCAGCTATGAGGGCGCAGGAGAAGTCCGAC  
 6/gb=BU970594+                                                                                           GGCGCAGGAGAAGTCCGAC  
 3/gb=AV938210+                           GAGGGGGATGACGTGGACGCAGCGGCGGCTGCAGCTATGAGGGCGCAGGAGAAGTCCGAC  
 2/gb=AV937315+                           GAGGGGGATGACGTGGACGCAGCGGCGGCTGCAGCTATGAGGGCGCAGGAGAAGTCCGAC

consensus                                           GAGGGGGATGACGTGGACGCAGCGGCGGCTGCAGCTATGAGGGCGCAGGAGAAGTCCGAC

12/gb=AK370136+ GAGGAGCTCACGAGGATGATTCAGGCGGAAGAAGAGGCACCTTCTACTGCAAAAGTACAGC  
7/gb=BJ479950+ GAGGAGCTCACGAGGATGATT  
6/gb=BU970594+ GAGGAGCTCACGAGGATGATTCAGGCGGAAGAAGAGGCACCTTCTACTGCAAAAGTACAGC  
3/gb=AV938210+ GAGGAGCTCACGAGGATGATTCANGCGGAAGAAGAGGCACCTTNTACTGCAAAAGTACAGC  
2/gb=AV937315+ GAGGAGCTCACGAGGATGATTCAGGCGGAAGAAGAGGCACCTTCTACTGCAAAAGTACAGC

consensus GAGGAGCTCACGAGGATGATTCAGGCGGAAGAAGAGGCACCTTCTACTGCAAAAGTACAGC

12/gb=AK370136+ ATACAAA-GTGACAGAGGAGAGGTGTTTCAGAGAAAGAGTTGAGCCATACATGCGCCAGGT  
6/gb=BU970594+ ATACAAA-GTGACAGAGGAGAGGTGTTTCAGAGAAAGAGTTGAGCCATACATGCGCCAGGT  
3/gb=AV938210+ ATACAAAAGTGACAGAGGAGAGGTGTTTCANAGAAAGAGNTGAGCCATACATGCG  
2/gb=AV937315+ ATACAAA-GTGACAGAGGAGAGGTGTTTCAGAGAAAGAGTTGAGCCATACATGCGCCAGGT

consensus ATACAAA-GTGACAGAGGAGAGGTGTTTCAGAGAAAGAGTTGAGCCATACATGCGCCAGGT

12/gb=AK370136+ TCTGAAGTACGAGGATTCGGTGCATCAGGAAGCAGCTCTGAAGACGGTTCCTGTAGATGA  
6/gb=BU970594+ TCTGAAGTACGAGGATTCGGTGCATCAGGAAGCAGCTCTGAAGACGGTTCCTGTAGATGA  
2/gb=AV937315+ TCTGAAGTACGAGGATTCGGTGCATCAGGAAGCAGCTCTGAAGACGGTTCCTGTAGATGA

consensus TCTGAAGTACGAGGATTCGGTGCATCAGGAAGCAGCTCTGAAGACGGTTCCTGTAGATGA

12/gb=AK370136+ ACTTAAGGAGAAGGCCTTGATTTCACTGGCCAAGGAAGGGACCTTCAGTCCTTCGAAAAA  
6/gb=BU970594+ ACTTAAGGAGAAGGCCTTGATTTCACTGGCCAAGGAAGGGACCTTCAGTCCTTCGAAAAA  
2/gb=AV937315+ ACTTAAGGAGAAGGCCTTGATTTCACTGGCCAAGGAAGGGACCTTCAGTCCTTCGAAAAA

consensus ACTTAAGGAGAAGGCCTTGATTTCACTGGCCAAGGAAGGGACCTTCAGTCCTTCGAAAAA

12/gb=AK370136+ TGAAGAGGATCATGCCTTTCTGTTGGAATTGCTTTTCTGGTTAAGCAATCATTAGATG  
6/gb=BU970594+ TGAAGAGGATCATGCCTTTCTGTTGGAATTGCTTTTCTGGTTAAGCAATCATTAGATG  
2/gb=AV937315+ TGAAGAGGATCATGCCTTTCTGTTGGAATTGCTTTTCTGGTTAAGCAATCATTAGATG

consensus TGAAGAGGATCATGCCTTTCTGTTGGAATTGCTTTTCTGGTTAAGCAATCATTAGATG

12/gb=AK370136+ GGTTAATGCAGCAGCTTGTGACATCTGTGACCGTGAAACATCTATGATTGGAATGGGAAA  
6/gb=BU970594+ GGTTAATGCAGCAGCTTGTGACATCTGTGACCGTGAAACATCTATGATTGGAATGGGAAA  
2/gb=AV937315+ GGTTAATGCAGCAGCTTGTGACATCTGTGACCGTGAAACATCTATGATTGGAATGGGAAA

consensus GGTTAATGCAGCAGCTTGTGACATCTGTGACCGTGAAACATCTATGATTGGAATGGGAAA

12/gb=AK370136+ CCCACTTCCCGCAGAAATTGAATTTGGTGTCTTCGCGTGTGAGATCTATAGGTGCAACCA  
6/gb=BU970594+ CCCACTTCCCGCAGAAATTGAATTTGGTGTCTTCGCGTGTGAGATCTATAGGTGCAACCA  
2/gb=AV937315+ CCCACTTCCCGCAGAAATTGAATTTGGTGTCTTCGCGTGTGAGATCTATAGGTGCAACCA

consensus CCCACTTCCCGCAGAAATTGAATTTGGTGTCTTCGCGTGTGAGATCTATAGGTGCAACCA

12/gb=AK370136+ TTGTTTCGAGCATCATCCGTTTCCAAGGTACAATGATCCGCATAAGCTTATACAAACTAG  
6/gb=BU970594+ TTGTTTCGAGCATCATCCGTTTCCAAGGTACAATGATCCGCATAAGCTTATACAAACTAG  
2/gb=AV937315+ TTGTTTCGAGCATCATCCGTTT

consensus TTGTTTCGAGCATCATCCGTTTCCAAGGTACAATGATCCGCATAAGCTTATACAAACTAG

12/gb=AK370136+ GAAAGGACGCTGTGGAGAATGGGCAAACCTGCTTCACATTCTACTGTGAGTTTTTGGATA  
6/gb=BU970594+ GAAAGGACGCTGTGGAGAATGGGCAAACCTG

consensus GAAAGGACGCTGTGGAGAATGGGCAAACCTGCTTCACATTCTACTGTGAGTTTTTGGATA

12/gb=AK370136+ CGAAGCTCGTTTGATTCTGGATTTCACTGATCATGTTTGGACAGAATGTTTTCAAACCT  
consensus CGAAGCTCGTTTGATTCTGGATTTCACTGATCATGTTTGGACAGAATGTTTTCAAACCT

12/gb=AK370136+ CTATGGGAGATGGATTCACTTCGATCCATGCGAAGGAGTCTATGATAATCCCTTGCTGTA  
consensus CTATGGGAGATGGATTCACTTCGATCCATGCGAAGGAGTCTATGATAATCCCTTGCTGTA

. : . : . : . : . : . : . :

12/gb=AK370136+ TGAGAAAGGGTGAACAAGAAATTAGATTATGCAATTGGTATCTCAAAGATGGAGTACA  
consensus TGAGAAAGGGTGAACAAGAAATTAGATTATGCAATTGGTATCTCAAAGATGGAGTACA  
. : . : . : . : . : . :  
12/gb=AK370136+ TGATGTAACATAACGCTACACCAGAAAGTGGCATGAGGTTCTCTCTAGGCGGACCATTAC  
consensus TGATGTAACATAACGCTACACCAGAAAGTGGCATGAGGTTCTCTCTAGGCGGACCATTAC  
. : . : . : . : . : . :  
12/gb=AK370136+ CTCCGAGGATACAGTTTCAGCTATTCTAATGAATATAACTACAAAGTGTGCGAGTGGATT  
consensus CTCCGAGGATACAGTTTCAGCTATTCTAATGAATATAACTACAAAGTGTGCGAGTGGATT  
. : . : . : . : . : . :  
12/gb=AK370136+ GTCAAGTGATGAACTCTTAGCCTTAGAAAACCGTGACAGGAAAGAGTCCAAGGAACTTAG  
consensus GTCAAGTGATGAACTCTTAGCCTTAGAAAACCGTGACAGGAAAGAGTCCAAGGAACTTAG  
. : . : . : . : . : . :  
12/gb=AK370136+ TAAAGCTATCTATCTTGAAATCAACAACAGCATATCTCTACCTGGAAGGCAAAGTGGTTC  
consensus TAAAGCTATCTATCTTGAAATCAACAACAGCATATCTCTACCTGGAAGGCAAAGTGGTTC  
. : . : . : . : . : . :  
12/gb=AK370136+ TGTGGAATGGAGAACAGCAAGGTCAGAAATTGGGCCAAGCAGACTCACTCAGTTGCTCGTC  
consensus TGTGGAATGGAGAACAGCAAGGTCAGAAATTGGGCCAAGCAGACTCACTCAGTTGCTCGTC  
. : . : . : . : . : . :  
12/gb=AK370136+ GTGTCTTATTCGGAGATGTGTGGATGCTCATGTTTCAAAAATATATGATGCTCTTTCAGC  
consensus GTGTCTTATTCGGAGATGTGTGGATGCTCATGTTTCAAAAATATATGATGCTCTTTCAGC  
. : . : . : . : . : . :  
12/gb=AK370136+ TATTCTTTCTTGTTTTTGTGATAATAACATCCGTAATGAAAGAATCATTGAAGTTTTTCGT  
consensus TATTCTTTCTTGTTTTTGTGATAATAACATCCGTAATGAAAGAATCATTGAAGTTTTTCGT  
. : . : . : . : . : . :  
12/gb=AK370136+ CACATTGAGGAGCTTGATGCAAAACCTTAAAGATGCCAACTTCAAAGCAGGAGAGTCAC  
consensus CACATTGAGGAGCTTGATGCAAAACCTTAAAGATGCCAACTTCAAAGCAGGAGAGTCAC  
. : . : . : . : . : . :  
12/gb=AK370136+ ATTAGATCAAAAATCGCAGCAAATTTTTGAGGAGATACTTCCCTCTGCTGAAAGATTGCT  
1/gb=AV835569- GAAAGATTGCT  
consensus ATTAGATCAAAAATCGCAGCAAATTTTTGAGGAGATACTTCCCTCTGCTGAAAGATTGCT  
. : . : . : . : . : . :  
12/gb=AK370136+ TTCTGCAGTTTCTTTGAAAGCAGACTTACACAATGATGGAGATCCATCCGTGGCTACAGA  
1/gb=AV835569- TTCTGCAGTTTCTTTGAAAGCAGACTTACACAATGATGGAGATCCATCCGTGGCTACAGA  
consensus TTCTGCAGTTTCTTTGAAAGCAGACTTACACAATGATGGAGATCCATCCGTGGCTACAGA  
. : . : . : . : . : . :  
12/gb=AK370136+ TGGAAATCTAATACATACATCCTTAGCATTACCAGTAGCACTAGATGCAGTTGATGAGAT  
1/gb=AV835569- TGGAAATCTAATACATACATCCTTAGCATTACCAGTAGCACTAGATGCAGTTGATGAGAT  
consensus TGGAAATCTAATACATACATCCTTAGCATTACCAGTAGCACTAGATGCAGTTGATGAGAT  
. : . : . : . : . : . :  
12/gb=AK370136+ ACTAAGTAACTATAAGAGCAATATCTTTTACACAAAAGGTCATCAATTTCTAGAGGCAA  
8/gb=BJ485214- AAAAGGTCATCAATTTCTAGAGGCAA  
1/gb=AV835569- ACTAAGTAACTATAAGAGCAATATCTTTTACACAAAAGGTCATCAATTTCTAGAGGCAA  
consensus ACTAAGTAACTATAAGAGCAATATCTTTTACACAAAAGGTCATCAATTTCTAGAGGCAA  
. : . : . : . : . : . :  
12/gb=AK370136+ TAGACTCTGTTTCAGGTTTCAGTCTTTCGCAAGCTGTGAGCAGCTCCCAATTGGAATTGCAAC  
9/gb=FD519350- CAGTCTCCCAATTGGAATTGCAAC  
8/gb=BJ485214- TAGACTCTGTTTCAGGTTTCAGTCTTTCGCAAGCTGTGAGCAGCTCCCAATTGGAATTGCAAC  
1/gb=AV835569- TAGACTCTGTTTCAGGTTTCAGTCTTTCGCAAGCTGTGAGCAGCTCCCAATTGGAATTGCAAC  
consensus TAGACTCTGTTTCAGGTTTCAGTCTTTCGCAAGCTGTGAGCAGCTCCCAATTGGAATTGCAAC

12/gb=AK370136+ AGCAGCCTTTGACGGCATTTCGCTTGTCCAATGGGAAGAACCTGATGGAGCCAAAGGATG  
9/gb=FD519350- AGCAGCCTTTGACGGCATTTCGCTTGTCCAATGGGAAGAACCTGATGGAGCCAAAGGATG  
8/gb=BJ485214- AGCAGCCTTTGACGGCATTTCGCTTGTCCAATGGGAAGAACCTGATGGAGCCAAAGGATG  
1/gb=AV835569- AGCAGCCTTTGACGGCATTTCGCTTGTCCAATGGGAAGAACCTGATGGAGCCAAAGGATG

consensus AGCAGCCTTTGACGGCATTTCGCTTGTCCAATGGGAAGAACCTGATGGAGCCAAAGGATG

12/gb=AK370136+ TTGGCTAATGTACAAGGTGCGTGATGGCCAAACTTGTGAGTTGGAGTCATATGATTTGAT  
9/gb=FD519350- TTGGCTAATGTACAAGGTGCGTGATGGCCAAACTTGTGAGTTGGAGTCATATGATTTGAT  
8/gb=BJ485214- TTGGCTAATGTACAAGGTGCGTGATGGCCAAACTTGTGAGTTGGAGTCATATGATTTGAT  
1/gb=AV835569- TTGGCTAATGTACAAGGTGCGTGATGGCCAAACTTGTGAGTTGGAGTCATATGATTTGAT

consensus TTGGCTAATGTACAAGGTGCGTGATGGCCAAACTTGTGAGTTGGAGTCATATGATTTGAT

12/gb=AK370136+ GTCAGCTAATGATGCTCCCAGAGGGATCCAATGGACTGGGTCCTTGAAGGGAGCACAGG  
9/gb=FD519350- GTCAGCTAATGATGCTCCCAGAGGGATCCAATGGACTGGGTCCTTGAAGGGAGCACAGG  
8/gb=BJ485214- GTCAGCTAATGATGCTCCCAGAGGGATCCAATGGACTGGGTCCTTGAAGGGAGCACAGG  
1/gb=AV835569- GTCAGCTAATGATGCTCCCAGAGGGATCCAATGGACTGGGTCCTTGAAGGGAGCACAGG  
11/gb=GH218900- GGATCCAATGGACTGGGTCCTTGAAGGGAGCACAGG

consensus GTCAGCTAATGATGCTCCCAGAGGGATCCAATGGACTGGGTCCTTGAAGGGAGCACAGG

12/gb=AK370136+ CCAAGGGTCTACCTGGAATACTATTGATGCTCGGAGTTCGTAACTTTCAGCAGCCGTTT  
9/gb=FD519350- CCAAGGGTCTACCTGGAATACTATTGATGCTCGGAGTTCGTAACTTTCAGCAGCCGTTT  
8/gb=BJ485214- CCAAGGGTCTACCTGGAATACTATTGATGCTCGGAGTTCGTAACTTTCAGCAGCCGTTT  
1/gb=AV835569- CCAAGGGTCTACCTGGAATACTATTGATGCTCGGAGTTCGTAACTTTCAGCAGCCGTTT  
11/gb=GH218900- CCAAGGGTCTACCTGGAATACTATTGATGCTCGGAGTTCGTAACTTTCAGCAGCCGTTT

consensus CCAAGGGTCTACCTGGAATACTATTGATGCTCGGAGTTCGTAACTTTCAGCAGCCGTTT

12/gb=AK370136+ CTGTAGGAAATCATTACCCTTGACAAGAGACGGAAGGCAAATGTACTTCGGTTTCGGTT  
9/gb=FD519350- CTGTAGGAAATCATTACCCTTGACAAGAGACGGAAGGCAAATGTACTTCGGTTTCGGTT  
8/gb=BJ485214- CTGTAGGAAATCATTACCCTTGACAAGAGACGGAAGGCAAATGTACTTCGGTTTCGGTT  
1/gb=AV835569- CTGTAGGAAATCATTACCCTTGACAAGAGACGGAAGGCAAATGTACTTCGGTTTCGGTT  
11/gb=GH218900- CTGTAGGAAATCATTACCCTTGACAAGAGACGGAAGGCAAATGTACTTCGGTTTCGGTT

consensus CTGTAGGAAATCATTACCCTTGACAAGAGACGGAAGGCAAATGTACTTCGGTTTCGGTT

12/gb=AK370136+ TCTACGTGTGAGAGAATCTAGTGCCAATCCTAGGTTTCAAATAGGATCCATCGACTTTTA  
9/gb=FD519350- TTTACGTGTGAGAGAATTTAGTGCCAATCCTAGGTTTCAAATAGGATCCATCGACTTTTA  
8/gb=BJ485214- TCTACGTGTGAGAGAATCTAGTGCCAATCCTAGGTTTCAAATAGGATCCATCGACTTTTA  
1/gb=AV835569- TCTACGTGTGAGAGAATCTAGTGCCAATCCTAGGTTTCAAATAGGATCCATCGACTTTTA  
11/gb=GH218900- TCTACGTGTGAGAGAATCTAGTGCCAATCCTAGGTTTCAAATAGGATCCATCGACTTTTA

consensus TCTACGTGTGAGAGAATCTAGTGCCAATCCTAGGTTTCAAATAGGATCCATCGACTTTTA

12/gb=AK370136+ CGGAAAAAACCACATGGCCTGATCGCAGGTGCTAATTTGTGTCTACAAAACCCAACAAAA  
9/gb=FD519350- CGGAAAAAACC  
8/gb=BJ485214- CGGAAAAAACCACATGGCCTGATCGCAGGTGCTAATTTGTGTCTACAAAACCCAACAAAA  
1/gb=AV835569- CGGAAAAAACCACATGGCCTGATCGCAGGTGCTAATTTGTGTCTACAAAACCCAACAAAA  
11/gb=GH218900- CGGAAAAAACCACATGGCCTGATCGCAGGTGCTAATTTGTGTCTACAAAACCCAACAAAA

consensus CGGAAAAAACCACATGGCCTGATCGCAGGTGCTAATTTGTGTCTACAAAACCCAACAAAA

12/gb=AK370136+ CCTTGTGCAATAGTGCAGTATCATGGCCAGTATGTGCAACCAATAATTGTACTATTTAT  
8/gb=BJ485214- CCTTGTGCAATAGTGCAGTATCATGGCCAGTATGTGCAACCAATAATTGTACTATTTAT  
1/gb=AV835569- CCTTGTGCAATAGTGCAGTATCATGGCCAGTATGTGCAACCAATAATTGTACTATTTAT  
11/gb=GH218900- CCTTGTGCAATAGTGCAGTATCATGGCCAGTATGTGCAACCAATAATTGTACTATTTAT

consensus CCTTGTGCAATAGTGCAGTATCATGGCCAGTATGTGCAACCAATAATTGTACTATTTAT

12/gb=AK370136+ CTTGGATGATTATAAATCCCGTTTCTACTCAAAAAAAAAAAAAAAAAAAAA  
11/gb=GH218900- GTTGGATGATTATAAATCCCGTTTCTACTCAAAAAAAAAAAAAAAAAAAAA

consensus CTTGGATGATTATAAATCCCGTTTCTACTCAAAAAAAAAAAAAAAAAAAAA

**Figure S2. Catalytic transglutaminase core in plant proteins closely related to AtPng1**

|                |                                                                        |         |         |
|----------------|------------------------------------------------------------------------|---------|---------|
|                | C                                                                      | H       | D       |
|                | ↓                                                                      | ↓       | ↓       |
| AtPng1         | TRFPRYNDPLKLVETKKGRCGEWANCFTLYCRTFGYDSRLIMDFTDHWVTECYSHSLKRWIHLDPCEGVY |         |         |
| B.distachyon   | TRFPRYNDPSKLLQTRKGRCGEWANCFTFYCRAFGYEARLILDFTDHWVTECFNSLYGRWMHLDPCEGVY |         |         |
| HvPNG-like     | TRFPRYNDPHKLIQTRKGRCGEWANCFTFYCRVFGYEARLILDFTDHWVTECFNSLYGRWIHFDPCEGVY |         |         |
| M.truncatula   | TRFPRYNDPKKLVETREGRCGEWANCFTLYCRAFGYESRLIQDFTDHWVTECYSQFLGRWMHLDPCEAIY |         |         |
| O.Sativa       | TRFPRYNDPYKLLERKGRCGEWANCFTFYCRSFGYEARLILDFTDHWVTECFNSLYGRWMHLDPCEGVY  |         |         |
| R.communis     | TRFPRYNDPMKLVETRRGRCGEWANCFTLYCRAFGYESRLILDFTDHWVTECFSQLLGRWMHLDPCEGVY |         |         |
| S.Lycopersicum | TRFPRYNDPLKLETRKGRCGEWANCFTLYCRAFGYDSRLILDFTDHWVTECFSSSLERWMHLDPCEGIY  |         |         |
| S.bicolor      | TRFPRYNDPRKLIQTRRGRCGEWANCFTFYCRAFGYDARLILDFTDHWVTECFNSLYGRWMHLDPCEGVY |         |         |
| V.vinifera     | TRFPRYNDPLKLVETRKGRCGEWANCFTLYCRAFGYESRLILDFTDHWVTECFSHCFGRWMHLDPCEAIF |         |         |
|                | *****                                                                  | ***:*** | *****:* |
|                | ***:***                                                                | *****:* | ***:*** |

**Figure S3. CAP3 assembly of sequences from the UniGene Hv.1565.** Sequence AK361332 is a cDNA corresponding to HvTGZ21-like protein, acc. no BAJ92539.1. Coding sequence has been highlighted.

```
***** Contig 1 *****
gb=AK361332+
      gb=CA004201+ is in gb=AK361332+
      gb=BY860982- is in gb=AK361332+
      gb=BY839165+ is in gb=AK361332+
      gb=BG366894+ is in gb=AK361332+
      gb=EX578617- is in gb=AK361332+
      gb=CB859768- is in gb=AK361332+
      gb=BY873374- is in gb=CB859768-
      gb=BY866443- is in gb=CB859768-
      gb=EX578618+ is in gb=AK361332+
      gb=AL501623- is in gb=EX578618+
      gb=BU998121+ is in gb=AK361332+
      gb=BE413043+ is in gb=AK361332+
      gb=AL504293+ is in gb=AK361332+
      gb=AJ484188+ is in gb=AL504293+
      gb=BU998587+ is in gb=AK361332+
```

DETAILED DISPLAY OF CONTIGS

```
***** Contig 1 *****
      . : . : . : . : . : . : . :
gb=AK361332+      AAAAAGCGAGCCTCCCTCCCGAGCGCGACAGCTAGGGTTCCTAGCCGCCGCCACCACTG-
gb=CA004201+      GAGCGCGACAGCTAGGGTTCCTAGCCGCCGCCACCACTGA
gb=BU998121+      AGCTAGGGTTCCTAGCCGCCGCC-CCACTG-

consensus      AAAAAGCGAGCCTCCCTCCCGAGCGCGACAGCTAGGGTTCCTAGCCGCCGCCACCACTG-

      . : . : . : . : . : . : . :
gb=AK361332+      CCGGCCCGCCGCCCGCGCGCGCCAGCCGGCCGGAGCCTCCGCTGCCCGCCTTCGGTAC
gb=CA004201+      CCGGCCCGCCGCCCGCGCGCGCCAGCCGGCCGGAGCCTCCGCTGCCCGCCTTCGGTAC
gb=BU998121+      CCGGCCCGCCGCCCGCGCGCGCCAGCCGGCCGGAGCCTCCGCTGCCCGCCTTCGGTAC

consensus      CCGGCCCGCCGCCCGCGCGCGCCAGCCGGCCGGAGCCTCCGCTGCCCGCCTTCGGTAC

      . : . : . : . : . : . : . :
gb=AK361332+      AATATCCCAGCAGCGCATCCCTCCGTCAAGCAGCCGCTCCCACCAGCGGCGCCTCCCTCC
gb=CA004201+      AATATCCCAGCAGCGCATCCCTCCGTCAAGCAGCCGCTCCCACCAGCGGCGCCTCCCTCC
gb=BU998121+      AATATCCCAGCAGCGCATCCCTCCGTCAAGCAGCCGCTCCCACCAGCGGCGCCTCCCTCC

consensus      AATATCCCAGCAGCGCATCCCTCCGTCAAGCAGCCGCTCCCACCAGCGGCGCCTCCCTCC

      . : . : . : . : . : . : . :
gb=AK361332+      CTGGAGCAGGCGCTCCCGCCGGAGCTACGCCGGCGACCAGTCCATAGGCAGGGCATCTA
gb=CA004201+      CTGGAGCAGGCGCTCCCGCCGGAGCTACGCCGGCGACCAGTCCATAGGCAGGGCATCTA
gb=BU998121+      CTGGAGCAGGCGCTCCCGCCGGAGCTACGCCGGCGACCAGTCCATAGGCAGGGCATCTA

consensus      CTGGAGCAGGCGCTCCCGCCGGAGCTACGCCGGCGACCAGTCCATAGGCAGGGCATCTA

      . : . : . : . : . : . : . :
gb=AK361332+      CATTGTCAATTGGAGGGGCTTGAAGTGTTCGGCATCAACAGTAGAGCAAACACGAAGG
gb=CA004201+      CATTGTCAATTGGAGGGGCTTGAAGTGTTCGGCATCAACAGTAGAGC
gb=BU998121+      CATTGTCAATTGGAGGGGCTTGAAGTGTTCGGCATCAACAGTAGAGCAAACACGAAGG
```

gb=BU998587+

AACAGTAGAGCAAACACGAAGG

consensus

CATTGTCAATTGGAGGGGCTTGGAACTGCTTCGGCATCAACAGTAGAGCAAACACGAAGG

gb=AK361332+

ATAATGGCTCATCGTGGACACCTAGATGGACTAATGCGCCATGGTGCATTCTCTGGAGCC

gb=BU998121+

ATAATGGCTCATCGTGGACACCTAGATGGACTAATGCGCCATGGTGCATTCTCTGGAGCC

gb=BE413043+

GTGGACACCTACATGGACTAATGCGCCATGGGGCATTCTCTGGAGCC

gb=AL504293+

GTGGACACCTACATGGACTAATGCGCCATGGGGCATTCTCTGGAGCC

gb=BU998587+

ATAATGGCTCATCGTGGACACCTAGATGGACTAATGCGCCATGGTGCATTCTCTGGAGCC

consensus

ATAATGGCTCATCGTGGACACCTAGATGGACTAATGCGCCATGGTGCATTCTCTGGAGCC

gb=AK361332+

GGCCTCTCTGGTCGCCAACCTTTGGAGCCTTCTCCTGCCACCATACTGGAGATCCTGGAA

gb=BU998121+

GGCCTCTCTGGTCGCCAACCTTTGGAGCCTTCTCCTGCCACCATACTGGAGATCCTGGAA

gb=BE413043+

GGCCTCTCTGGTCGCCAACCTTTGGAGCCTTCTCCTGCCACCATACTGGAGATCCTGGAA

gb=AL504293+

GGCCTCTCTGGTCGCCAACCTTTGGAGCCTTCTCCTGCCACCATACTGGAGATCCTGGAA

gb=BU998587+

GGCCTCTCTGGTCGCCAACCTTTGGAGCCTTCTCCTGCCACCATACTGGAGATCCTGGAA

consensus

GGCCTCTCTGGTCGCCAACCTTTGGAGCCTTCTCCTGCCACCATACTGGAGATCCTGGAA

gb=AK361332+

AACAAGCTTGCCGTGCAGACCGCAGAGGCAGAAAAAATTATCAGAGAAAATCAGCGATTG

gb=BU998121+

AACAAGCTTGCCGTGCAGACCGCAGAGGCAGAAAAAATTATCAGAGAAAATCAGCGATTG

gb=BE413043+

AACAAGCTTGCCGTGCAGACCGCAGAGGCAGAAAAAATTATCAGAGAAAATCAGCGATTG

gb=AL504293+

AACAAGCTTGCCGTGCAGACCGCAGAGGCAGAAAAAATTATCAGAGAAAATCAGCGATTG

gb=AJ484188+

CTTATCAGAGAAAATCAGCGATTG

gb=BU998587+

AACAAGCTTGCCGTGCAGACCGCAGAGGCAGAAAAAATTATCAGAGAAAATCAGCGATTG

consensus

AACAAGCTTGCCGTGCAGACCGCAGAGGCAGAAAAAATTATCAGAGAAAATCAGCGATTG

gb=AK361332+

GCAGATAGCCATGCGGCCCTTGAGAAAGGATATTATTGGCACTGAGACAGAAATGCAAATG

gb=BY839165+

TATTGGCACTGAGACAGAAATGCAAATG

gb=BU998121+

GCAGATAGCCATGCGGCCCTTGAGAAAGGATATTATTGGCACTGAGACAGAAATGCAAATG

gb=BE413043+

GCAGATAGCCATGCGGCCCTTGAGAAAGGATATTATTGGCACTGAGACAGAAATGCAAATG

gb=AL504293+

GCAGATAGCCATGCGGCCCTTGAGAAAGGATATTATTGGCACTGAGACAGAAATGCAAATG

gb=AJ484188+

GCAGATAGCCATGCGGCCCTTGAGAAAGGATATTATTGGCACTGAGACAGAAATGCAAATG

gb=BU998587+

GCAGATAGCCATGCGGCCCTTGAGAAAGGATATTATTGGCACTGAGACAGAAATGCAAATG

consensus

GCAGATAGCCATGCGGCCCTTGAGAAAGGATATTATTGGCACTGAGACAGAAATGCAAATG

gb=AK361332+

ATTCGCACCCACCTAGGTGATGTCCAGGTAGAGACTGATATGCACATGAGAGATTTGGTG

gb=BY839165+

ATTCGCACCCACCTAGGTGATGTCCAGGTAGAGACTGATATGCACATGAGAGATTTGGTG

gb=BU998121+

ATTCGCACCCACCTAGGTGATGTCCAGGTAGAGACTGATATGCACATGAGAGATTTGGTG

gb=BE413043+

ATTCGCACCCACCTAGGTGATGTCCAGGTAGAGACTGATATGCACATGAGAGATTTGGTG

gb=AL504293+

ATTCGCACCCACCTAGGTGATGTCCAGGTAGAGACTGATATGCACATGAGAGATTTGGTG

gb=AJ484188+

ATTCGCACCCACCTAGGTGATGTCCAGGTAGAGACTGATATGCACATGAGAGATTTGGTG

gb=BU998587+

ATTCGCACCCACCTAGGTGATGTCCAGGTAGAGACTGATATGCACATGAGAGATTTGGTG

consensus

ATTCGCACCCACCTAGGTGATGTCCAGGTAGAGACTGATATGCACATGAGAGATTTGGTG

gb=AK361332+

GAGAGAATCAGATTAATGGAGGCGGACATACGGGCTGGTGAGGCAGTGATGAAGGAACCTT

gb=BY839165+

GAGAGAATCAGATTAATGGAGGCGGACATACGGGCTGGTGAGGCAGTGATGAAGGAACCTT

gb=BU998121+

GAGAGAATCAGATTAATGGAGGCGGACATACGGGCTGGTGAGGCAGTGATGAAGGAACCTT

gb=BE413043+

GAGAGAATCAGATTAATGGAGGCGGACATACGGGCTGGTGAGGCAGTGATGAAGGAACCTT

gb=AL504293+

GAGAGAATCAGATTAATGGAGGCGGACATACGGGCTGGTGAGGCAGTGATGAAGGAACCTT

gb=AJ484188+

GAGAGAATCAGATTAATGGAGGCGGACATACGGGCTGGTGAGGCAGTGATGAAGGAACCTT

gb=BU998587+

GAGAGAATCAGATTAATGGAGGCGGACATACGGGCTGGTGAGGCAGTGATGAAGGAACCTT

consensus

GAGAGAATCAGATTAATGGAGGCGGACATACGGGCTGGTGAGGCAGTGATGAAGGAACCTT

gb=AK361332+

CACCAAGTGCATATGGAGGCAAAGCGACTTATTGCTGAAAGGCAGAGGCTTACTAATGAT

gb=BY839165+

CACCAAGTGCATATGGAGGCAAAGCGACTTATTGCTGAAAGGCAGAGGCTTACTAATGAT

gb=BE413043+

CACCAAGTGCATATGGAGGCAAAGCGACTTATTGCTGAAAGGCAGAGGCTTACTAATGAT

gb=AL504293+

CACCAAGTGCATATGGAGGCAAAGCGACTTATTGCTGAAAGGCAGAGGCTTACTAATGAT

gb=BU998587+

CACCAAGTGCATATGGAGGCAAAGCGACTTATTGCTGAAAGGCAGAGGCTTACTAATGAT

consensus

CACCAAGTGCATATGGAGGCAAAGCGACTTATTGCTGAAAGGCAGAGGCTTACTAATGAT

gb=AK361332+

GTAGAGGCTGCGACTAAAGAACTACAGAAGTACTCTGGTGACAATAGTAACCTTGCTGAA

gb=BY839165+  
gb=BE413043+  
gb=AL504293+  
gb=BU998587+

GTAGAGGCTGCGACTAAAGAACTACAGAAGTACTCTGGTGACAATAGTAACCTTGCTGAA  
GTANAGGCTGCGACTAAAGAACTACAGAAGTACTCTGGTGACAATAGTAACCTTGCTGAA  
GTANAGGCTGCGACTAAAGAACTACAGAAGTACTCTGGTGACAATAGTAACCTTGCTGAA  
GTAGAGGCTGCGACTAAAGAACTACAGAAGTACTCTGGTGACAATAGTAACCTTGCTGAA

consensus

GTAGAGGCTGCGACTAAAGAACTACAGAAGTACTCTGGTGACAATAGTAACCTTGCTGAA

gb=AK361332+  
gb=BY839165+  
gb=BG366894+  
gb=BE413043+  
gb=AL504293+  
gb=BU998587+

. : . : . : . : . : . :  
TTGGTTGCGGAGCTAGATGGTCTACGGAAAGAGCATCATGGTCTAAGATCTGCCTTCGAG  
TTGGTTGCGGAGCTAGATGGTCTACGGAAAGAGCATCATGGTCTAAGATCTGCCTTCGAG  
AAGAGCATCACGGTCTAAGATCTGCCTTCGAG  
TTGGTTGCGGAGCTAGATGGTCTACGGAAAGAGCATCATGGTCTAAGATCTGCCTTCGAG  
TTGGTTGCGGAGCTAGATGGTCTACGGAAAGAGCATCATGGTCTAAGATCTGCCTTCGAG  
TTGGTTGCGGAGCTAGATGGTCTACGGAAAGAGCATCATGGTCTAAGATCTGCCTTCGAG

consensus

TTGGTTGCGGAGCTAGATGGTCTACGGAAAGAGCATCATGGTCTAAGATCTGCCTTCGAG

gb=AK361332+  
gb=BY839165+  
gb=BG366894+  
gb=BE413043+  
gb=AL504293+  
gb=BU998587+

. : . : . : . : . : . :  
TATGAGAAAAACACAAACATCAAGCAAGTT-GAGCAGATGCGGACCATGGAATGAACTT  
TATGAGAAAAACACAAACATCAAGCAAGTT-GAGCAGATGCGGACCCATGGAATGAACTT  
TATGAGAAAAACACAAACATCAAGCAAGTT-GAGCAGATGCGGACCATGGAATGAACTT  
TATGAGAAAAACACAAACATCAAGCANGTTTGAGCAGATGCGGACCATGGAATGAACTT  
TATGAGAAAAACACAAACATCAAGCANGTTTGAGCAGATGCGGACCATGGAATGAACTT  
TATGAGAAAAACACAAACATCAAGCAAGTT-GAGCAGATGCGGACCATGGAATGAACTT

consensus

TATGAGAAAAACACAAACATCAAGCAAGTT-GAGCAGATGCGGACCATGGAATGAACTT

gb=AK361332+  
gb=BY839165+  
gb=BG366894+  
gb=BE413043+  
gb=AL504293+  
gb=BU998587+

. : . : . : . : . : . :  
GATAACCATGACTAAAGAGGCGGACAAGTTACGAGCTGATTTGGCAAATGCTGCAAACCG  
GATAACCATGACTAAAGAGGCGGANCAGTTACGAGCTGATTTGGCAAATGCTGCAAACCG  
GATAACCATGACTAAAGAGGCGGACAAGTTACGAGCTGATTTGGCAAATGCTGCAAACCG  
GATAACCATGACTAAAGAGGCGGACATGTTACGAGCTGATTTGGCAAATGCTGCAAACCG  
GATAACCATGACTAAAGAGGCGGACATGTTACGAGCTGATTTGGCAAATGCTGCAAACCG  
GATAACCATGACTAAAGAGGCGGACAAGTTACGAGCTG

consensus

GATAACCATGACTAAAGAGGCGGACAAGTTACGAGCTGATTTGGCAAATGCTGCAAACCG

gb=AK361332+  
gb=BY839165+  
gb=BG366894+  
gb=BE413043+  
gb=AL504293+

. : . : . : . : . : . :  
AGCACATGCAGCACAGGTTACACC-TCCACAGCCTGGGACAGCACAAGCTGCAGCGGCTT  
AGCACATGCAGCACAGGTTACACC  
AGCACATGCAGCACAGGTTACACC-TCCACAGCCTGGGACAGCACAAGCTGCAGCGGCTT  
AGCACATGCAGCACAGGTTACACCCTCCACANCCTGGGACAGCACAAGCTGCAGCGGCTT  
AGCACATGCAGCACAGGTTACACC

consensus

AGCACATGCAGCACAGGTTACACC-TCCACAGCCTGGGACAGCACAAGCTGCAGCGGCTT

gb=AK361332+  
gb=BG366894+  
gb=BE413043+

. : . : . : . : . : . :  
CAGCAGCCACAAATCCATATGCAAGTGCATATACCAATCACCCCTCCGCATATCAGCAAG  
CAGCAGCCACAAATCCATATGCAAGTGCATATACCAATCACCCCTCCGCATATCAGCAAG  
CAGCAGC

consensus

CAGCAGCCACAAATCCATATGCAAGTGCATATACCAATCACCCCTCCGCATATCAGCAAG

gb=AK361332+  
gb=BG366894+

. : . : . : . : . : . :  
GAACTTCCCAAGCCACGGCATAACCAGCAAGGAATCCCCCAAGCCGCGGCATAACCAGCAAG  
GAACTTCCCAAGCCGCGGCATAACCAGCAAGGAATCCCCCAAGCCGCGGCATAACCAGCAAG

consensus

GAACTTCCCAAGCCACGGCATAACCAGCAAGGAATCCCCCAAGCCGCGGCATAACCAGCAAG

gb=AK361332+  
gb=BG366894+

. : . : . : . : . : . :  
GAACTTCCCAAGCCACGGCATAACCAGCAAGGAAGTCCCAAGCCGCGGCATAACCAGCAAG  
GAACTTCCCAAGCCACGGCATAACCAGCAAGGAAGTCCCAAGCCGCGGCATAACCAGCAAG

consensus

GAACTTCCCAAGCCACGGCATAACCAGCAAGGAAGTCCCAAGCCGCGGCATAACCAGCAAG

gb=AK361332+  
gb=BG366894+

. : . : . : . : . : . :  
GAACTTCCCAAGCCGCGGCATAACCAGCAAGGAACCCCCAAGCCGCGGCATAACCAGCAAG  
GAACTTCCCAAGCCGCGGCATTACCAGCAGGAACCCCCAAGCCGCGGCATAACCAGCAAG

consensus

GAACTTCCCAAGCCGCGGCATAACCAGCAAGGAACCCCCAAGCCGCGGCATAACCAGCAAG

gb=AK361332+  
gb=BG366894+

. : . : . : . : . : . :  
GAACCCCCAAGCCGCGGCATAACCAGCAAGGAGGACACCCCCAAGCCGCGGCATAACCAGC  
GAACCCCTCAAGCCGCGGCATAACCAGCAAGGA

consensus

GAACCCCCAAGCCGCGGCATAACCAGCAAGGAGGACACCCCCAAGCCGCGGCATAACCAGC



gb=AK361332+ AAGGAGGACACCCCCAAGCTGGATCATACCAACAAGGACCTCCCCAAGCTGGAGCATATC  
gb=CB859768- GCATATC

consensus AAGGAGGACACCCCCAAGCTGGATCATACCAACAAGGACCTCCCCAAGCTGGAGCATATC

gb=AK361332+ AACAAAGGACCTCCCCAAGGGGCATACGCTTACCCAACAGCTTATGATTCTGCCACCGCTT  
gb=EX578617- CAGCTTATGATTCTGCCACCGCTT  
gb=CB859768- AACAAAGGACCTCCCCAAGGGGCATACGCTTACCCAACAGCTTATGATTCTGCCACCGCTT  
gb=BY873374- ACCGCTT  
gb=BY866443- T  
gb=EX578618+ GGACCTCCCCAAGGGGCATACGCTTACCCAACAGCTTATGATTCTGCCACCGCTT

consensus AACAAAGGACCTCCCCAAGGGGCATACGCTTACCCAACAGCTTATGATTCTGCCACCGCTT

gb=AK361332+ ACCAGCTGCAGGCTAATGCGTATGCTAGCTATTCT-GGCTATCCAGTTGCAGGTTATGCG  
gb=EX578617- ACCAGCTGCAGGCTAATGCGTATGCTAGCTATTCT-GGCTATCCAGTTGCAGGTTATGCG  
gb=CB859768- ACCAGCTGCAGGCTAATGCGTATGCTAGCTATTCT-GGCTATCCAGTTGCAGGTTATGCG  
gb=BY873374- ACCAGCTGCAGGCTAATGCGTATGCTAGCTATTCT-GGCTATCCAGTTGCAGGTTATGCG  
gb=BY866443- ACCAGCTGCAGGCTAATGCGTATGCTAGCTATTCT-GGCTATCCAGTTGCAGGTTATGCG  
gb=EX578618+ ACCAGCTGCAGGCTAATGCGTATGCTAGCTATTCT-GGCTATCCAGTTGCAGGTTATGCG  
gb=AL501623- AATGCGTATGCTAGCTATTCTTGGCTANCCAGTTGCAGGTTATGCG

consensus ACCAGCTGCAGGCTAATGCGTATGCTAGCTATTCT-GGCTATCCAGTTGCAGGTTATGCG

gb=AK361332+ CAACCCAACTATCCTGGCACGTACGCTGCACCTCAGCACCCAGTAGCCAGTGGCGCGGCT  
gb=BY860982- CTGGCACGTACGCTGCACCTCAGCACCCAGTAGCCAGTGGCGCGGCT  
gb=EX578617- CAACCCAACTATCCTGGCACGTACGCTGCACCTCAGCACCCAGTAGCCAGTGGCGCGGCT  
gb=CB859768- CAACCCAACTATCCTGGCACGTACGCTGCACCTCAGCACCCAGTAGCCAGTGGCGCGGCT  
gb=BY873374- CAACCCAACTATCCTGGCACGTACGCTGCACCTCAGCACCCAGTAGCCAGTGGCGCGGCT  
gb=BY866443- CAACCCAACTATCCTGGCACGTACGCTGCACCTCAGCACCCAGTAGCCAGTGGCGCGGCT  
gb=EX578618+ CAACCCAACTATCCTGGCACGTACGCTGCACCTCAGCACCCAGTAGCCAGTGGCGCGGCT  
gb=AL501623- CAACCCAACTATCCTGGCACGTACGNTGCACCTCAGCACCCAGTAGCCAGTGGCGCGGCT

consensus CAACCCAACTATCCTGGCACGTACGCTGCACCTCAGCACCCAGTAGCCAGTGGCGCGGCT

gb=AK361332+ ACTGATGCCACGAGCGCGTACGGTGC GGCTGGTAGCACGGGATATCCTGCTGCACCGGTT  
gb=BY860982- ACTGATGCCACGAGCGCGTACGGTGC GGCTGGTAGCACGGGATATCCTGCTGCACCGGTT  
gb=EX578617- ACTGATGCCACGAGCGCGTACGGTGC GGCTGGTAGCACGGGATATCCTGCTGCACCGGTT  
gb=CB859768- ACTGATGCCACGAGCGCGTACGGTGC GGCTGGTAGCACGGGATATCCTGCTGCACCGGTT  
gb=BY873374- ACTGATGCCACGAGCGCGTACGGTGC GGCTGGTAGCACGGGACATCCTGCTGCACCGGTT  
gb=BY866443- ACTGATGCCACGAGCGCGTACGGTGC GGCTGGTAGCACGGGATATCCTGCTGCACCGGTT  
gb=EX578618+ ACTGATGCCACGAGCGCGTACGGTGC GGCTGGTAGCACGGGATATCCTGCTGCACCGGTT  
gb=AL501623- ACTGATGCCACGAGCGCGTACGGTGC GGCTGGTAGCACGGGATATCCTGCTGCACCGGTT

consensus ACTGATGCCACGAGCGCGTACGGTGC GGCTGGTAGCACGGGATATCCTGCTGCACCGGTT

gb=AK361332+ CAGGCAAGCAGCGGGGCTGCCAATGCGGGGCAAGCACCGCCAGCTCCTTATCCTGCAACG  
gb=BY860982- CAGGCAAGCAGCGGGGCTGCCAATGCGGGGCAAGCACCGCCAGCTCCTTATCCTGCAACG  
gb=EX578617- CAGGCAAGCAGCGGGGCTGCCAATGCGGGGCAAGCACCGCCAGCTCCTTATCCTGCAACG  
gb=CB859768- CAGGCAAGCAGCGGGGCTGCCAATGCGGGGCAAGCACCGCCAGCTCCTTATCCTGCAACG  
gb=BY873374- CAGGCAAGCAGCGGGGCTGCCAATGCGGGGCAAGCACCGCCAGCTCCTTATCCTGCAACG  
gb=BY866443- CAGGCAAGCAGCGGGGCTGCCAATGCGGGGCAAGCACCGCCAGCTCCTTATCCTGCAACG  
gb=EX578618+ CAGGCAAGCAGCGGGGCTGCCAATGCGGGGCAAGCACCGCCAGCTCCTTATCCTGCAACG  
gb=AL501623- CAGGCAAGCAGCGGGGCTGCCAATGCGGGGCAAGCACCGCCAGCTCCTTATCCTGCAACG

consensus CAGGCAAGCAGCGGGGCTGCCAATGCGGGGCAAGCACCGCCAGCTCCTTATCCTGCAACG

gb=AK361332+ TATGACCCAACCAAAGCAGCCAGAGGTGAAAAATCCGGGGTTCGTAACCTGAAGATGGCC  
gb=BY860982- TATGACCCAACCAAAGCAGCCAGAGGTGAAAAATCCGGGGTTCGTAACCTGAAGATGGCC  
gb=EX578617- TATGACCCAACCAAAGCAGCCAGAGGTGAAAAATCCGGGGTTCGTAACCTGAAGATGGCC  
gb=CB859768- TATGACCCAACCAAAGCAGCCAGAGGTGAAAAATCCGGGGTTCGTAACCTGAAGATGGCC  
gb=BY873374- TATGACCCAACCAAAGCAGCCAGAGGTGAAAAATCCGGGGTTCGTAACCTGAAGATGGCC  
gb=BY866443- TATGACCCAACCAAAGCAGCCAGAGGTGAAAAATCCGGGGTTCGTAACCTGAAGATGGCC  
gb=EX578618+ TATGACCCAACCAAAGCAGCCAGAGGTGAAAAATCCGGGGTTCGTAACCTGAAGATGGCC  
gb=AL501623- TATGACCCAACCAAAGCAGCCAGAGGTGAAAAATCCGGGGTTCGTAACCTGAAGATGGCC

consensus TATGACCCAACCAAAGCAGCCAGAGGTGAAAAATCCGGGGTTCGTAACCTGAAGATGGCC

. : . : . : . : . : . :  
gb=AK361332+ TGTATGCCCGCAAATTTTATCCAAAAATCTCATGGCTCTCATTTTCCTTCATGTACATT  
gb=BY860982- TGTATGCCCGCAAATTTTATCCAAAAATCTCATGGCTCTCATTTTCCTTCATGTACATT  
gb=EX578617- TGTATGCCCGCAAATTTTATCCAAAAATCTCATGGCTCTCATTTTCCTTCATGTACATT  
gb=CB859768- TGTATGCCCGCAAATTTTATCCAAAAATCTCATGGCTCTCATTTTCCTTCATGTACATT  
gb=BY873374- TGTATGCCCGCAAATTTTATCCAAAAATCTCATGGCTCTCATTTTCCTTCATGTACATT  
gb=BY866443- TGTATGCCCGCAAATTTTATCCAAAAATCTCATGGCTCTCATTTTCCTTCATGTACATT  
gb=EX578618+ TGTATGCCCGCAAATTTTATCCAAAAATCTCATGGCTCTCATTTTCCTTCATGTACATT  
gb=AL501623- TGTATGCCCGCAAATTTTATCCAAAAATCTCATGGCTCTCATTTTCCTTCATGTACATT

consensus TGTATGCCCGCAAATTTTATCCAAAAATCTCATGGCTCTCATTTTCCTTCATGTACATT

. : . : . : . : . : . :  
gb=AK361332+ CATTCACTCCCTGTAGCTTTATGCACACCATGGGGCCGCTGAGAGTCGCAGTTTATGGTC  
gb=BY860982- CATTCACTCCCTGTAGCTTTATGCACACCATGGGGCCGCTGAGAGTCGCAGTTTATGGTC  
gb=EX578617- CATTCACTCCCTGTAGCTTTATGCACACCATGGGGCCGCTGAGAGTCGCAGTTTATGGTC  
gb=CB859768- CATTCACTCCCTGTAGCTTTATGCACACCATGGGGCCGCTGAGAGTCGCAGTTTATGGTC  
gb=BY873374- CATTCACTCCCTGTAGCTTTATGCACACCATGGGGCCGCTGAGAGTCGCAGTTTATGGTC  
gb=BY866443- CATTCACTCCCTGTAGCTTTATGCACACCATGGGGCCGCTGAGAGTCGCAGTTTATGGTC  
gb=EX578618+ CATTCACTCCCTGTAGCTTTATGCACACCATGGGGCCGCTGAGAGTCGCAGTTTATGGTC  
gb=AL501623- CATTCACTCCCTGTAGCTTTATGCACACCATGGGGCCGCTGAGAGTCGCAGTTTATGGTC

consensus CATTCACTCCCTGTAGCTTTATGCACACCATGGGGCCGCTGAGAGTCGCAGTTTATGGTC

. : . : . : . : . : . :  
gb=AK361332+ GGAGTCTTGAATTGATTTGTATCTCTTGTTTTGTCTGGATGGTTGAACTGATATAGACGTA  
gb=BY860982- GGAGTCTTGAATTGATTTGTATCTCTTGTTTTGTCTGGATGGTTGAACTGATATAGACGTA  
gb=EX578617- GGAGTCTTGAATTGATTTGTATCTCTTGTTTTGTCTGGATGGTTGAACTGATATAGACGTA  
gb=CB859768- GGAGTCTTGAATTGATTTGTATCTCTTGTTTTGTCTGGATGGTTGAACTGATATAGACGTA  
gb=BY873374- GGAGTCTTGAATTGATTTGTATCTCTTGTTTTGTCTGGATGGTTGAACTGATATAGACGTA  
gb=BY866443- GGAGTCTTGAATTGATTTGTATCTCTTGTTTTGTCTGGATGGTTGAACTGATATAGACGTA  
gb=EX578618+ GGAGTCTTGAATTGATTTGTATCTCTTGTTTTGTCTGGATGGTTGAACTGATATAGACGTA  
gb=AL501623- GGAGTCTTGAATTGATTTGTATCTCTTGTTTTGTCTGGATGGTTGAACTGATATAGACGTA

consensus GGAGTCTTGAATTGATTTGTATCTCTTGTTTTGTCTGGATGGTTGAACTGATATAGACGTA

. : . : . : . : . : . :  
gb=AK361332+ ACTGTTGGCTAATATCAGGGATGTTAGAATTACTCTTGCTGTTTTGAAATAGTGGGAAAC  
gb=BY860982- ACTGTTGGCTAATATCAGGGATGTTAGAATT  
gb=EX578617- ACTGTTGGCTAATATCAGGGATGTTAGAATT  
gb=CB859768- ACTGTTGGCTAATATCAG  
gb=EX578618+ ACTGTTGGCTAATATCAGGGATGTTAGAATT  
gb=AL501623- ACTGTTGGCTAA

consensus ACTGTTGGCTAATATCAGGGATGTTAGAATTACTCTTGCTGTTTTGAAATAGTGGGAAAC

. : . : . : . : . : . :  
gb=AK361332+ CTAGCTGTGGTGCAGGCTTTTTACCC

consensus CTAGCTGTGGTGCAGGCTTTTTACCC

**Figure S4. Clustal2W sequence alignment of plant proteins showing partial similarity to maize TGZ21 protein.** Significant similarity only to ~220 N-terminal amino acids of the TGZ21/TGZ15 sequences is maintained. Downstream of this region, the protein sequences become more diverse and several subgroups can be easily identified, with the *Poaceae* forming a distinct subgroup. However, the TGZ21 sequence similarity to other *Poaceae* proteins rapidly discontinues after Gly249. Accession IDs of the proteins are: HvTGZ21-like (BAJ92539.1), TGZ21 (CAD32336.1), *S.bicolor* (XP\_002448045.1), *B.distachyon* (XP\_003579974.1), *O.sativa* (NP\_001053092.1), *V.vinifera1* (XP\_002277975.1), *V.vinifera2* (XP\_002282805.1), *P.trichocarpa* (XP\_002308428.1), *R.communis1* (XP\_002528217.1), *R.communis2* (XP\_002531483.1), *A.lyrata* (XP\_002887107.1), *A.thaliana* (NP\_176888.2), *G.max1* (XP\_003551793.1), *G.max2* (XP\_003531907.1). Except for barley and maize proteins, all the other sequences are from the NCBI refseq database.

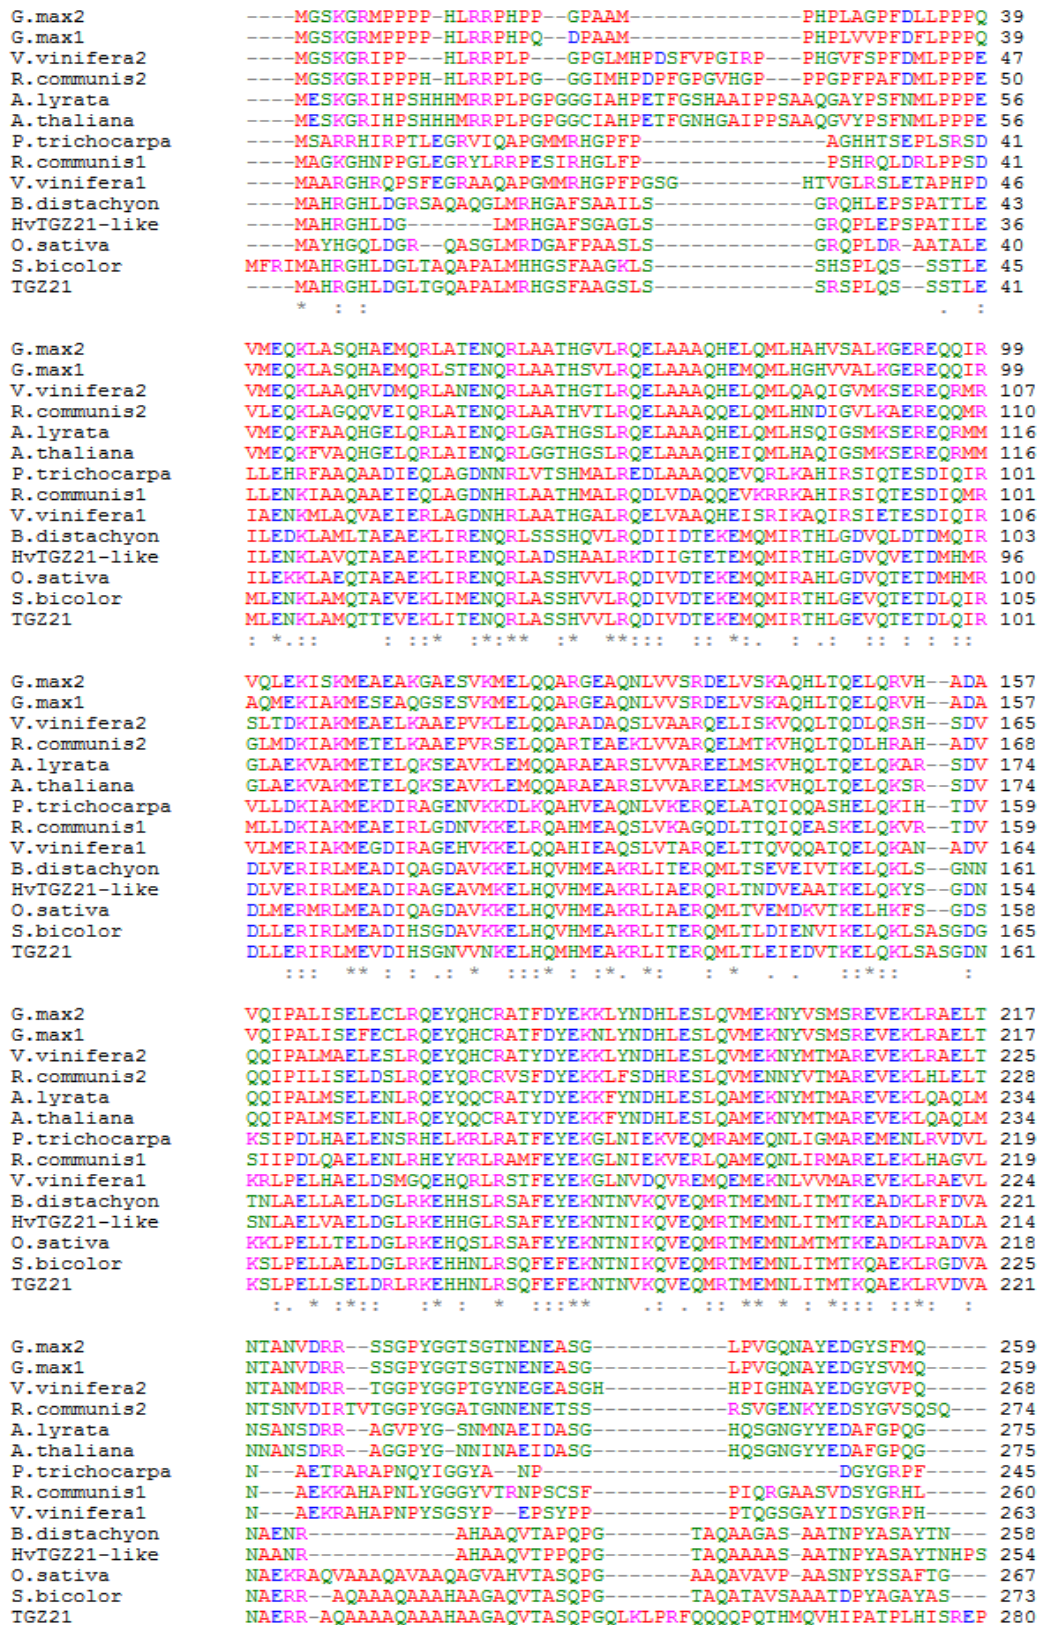

Fig S4 Continued.

|               |                                                                |     |
|---------------|----------------------------------------------------------------|-----|
| G.max2        | -----GRGPLP-----AASG-----GGGNATIL                              | 277 |
| G.max1        | -----GRGPLP-----AAAGS-----GGGNATTI                             | 278 |
| V.vinifera2   | GRAPLPGATGGGVAAAG-----GGGGGGTP                                 | 294 |
| R.communis2   | -----GHTPIPGNSGSAATAAGSASTGAKAGTGAGTP                          | 307 |
| A.lyrata      | -----YIPQS-----VAGN-----AAGPNSI                                | 291 |
| A.thaliana    | -----YIPQP-----VAGN-----ATGPNSV                                | 291 |
| P.trichocarpa | -----VHMGV-----                                                | 250 |
| R.communis1   | -----VHTRV-----                                                | 265 |
| V.vinifera1   | -----AQMIA-----                                                | 268 |
| B.distachyon  | -----QAAAYQQGNPQAVAYQQ-----QQGTQQA                             | 283 |
| HvTG221-like  | AYQQGTSQATAYQQGIPQAAAYQQGTSQATAYQQGTSQAAAYQQGTSQAAAYQQGTPQA    | 314 |
| O.sativa      | -----HPSAYHQG-----ATQAG                                        | 280 |
| S.bicolor     | -----YPSAYQQG-----AQAA                                         | 285 |
| TG221         | RLGHISRVLRLGLYISREPRLLGHISRPRLLGHISRGARMGHISRGLRLGHISRPRLLGHIS | 340 |
|               |                                                                |     |
| G.max2        | ITAGGQPGPAPAGTG-----YDAPRPGPYGASAGPA-                          | 308 |
| G.max1        | ITAGGQPGPAPAGTG-----YDAPIGPGYGASTGST-                          | 309 |
| V.vinifera2   | AYAGPQSGPAASTRPG-----YDGRPGPYDAPRPGP-                          | 325 |
| R.communis2   | TYTGAQSGSASTRSA-----YDTPRGPNYEATKGPS-                          | 338 |
| A.lyrata      | VGAAQYPYPGVVTQPG-----YFPPR-PGYNFPRGP-                          | 320 |
| A.thaliana    | VGAAQYPYPGVVTQPG-----YFPQR-PGYNFPRGP-                          | 320 |
| P.trichocarpa | GPAGEGIIPYNSNS-----VVSNVGFGGAAMSTTG-                           | 281 |
| R.communis1   | GPAVNGTIPYDNGNN-----AAIICGIGGSVSSAG-                           | 296 |
| V.vinifera1   | GTPSAGMIPY-----GSVAIPAS-                                       | 287 |
| B.distachyon  | AYQHGTPQAAAYQQG-----TLQGGAYQQGTPAGTYAYPTA-                     | 319 |
| HvTG221-like  | AYQQGTPQAAAYQQGGHPQAAAYQQGGHPQAGSYQQGPPQAGAYQQGPPQAGAYAYPTA-   | 372 |
| O.sativa      | VYQQGTTQAGAYQQG-----STQAGAYAYPT                                | 306 |
| S.bicolor     | AYQQG-AQAAAYQLG-----AYQHGTPQAGAYQQGN-                          | 314 |
| TG221         | REPRLLGHISRVLRLGLYISREPRLLGHISRPRLLGHISRARMGHISRGLRLG          | 400 |
|               |                                                                |     |
| G.max2        | -----YDAQRVATYDAQRLIGYDAFRGSAYDSKRGPIFDAQRT-                   | 346 |
| G.max1        | -----YDAQRGATYDTRQLTGSNAFRGSAYDSKRGSYDMQRAP-                   | 348 |
| V.vinifera2   | -----YDAPRPGPYDPRGPGYDAQRGPGYDAQRGPAVDGQRGP-                   | 364 |
| R.communis2   | -----YDVSRRSGYDLRGAAYDAQRGHSYDAQRGPGYDMQRGSPSYDAQQRVP-         | 386 |
| A.lyrata      | -----PGSYDPTIR-----LPTGPGAPFPPG                                | 342 |
| A.thaliana    | -----PGSYDPTIR-----LPTGPGAPFPPG                                | 342 |
| P.trichocarpa | -----GVAQWVGFDP-SHARG-----                                     | 297 |
| R.communis1   | -----GVAPLGGSDP-SLAEK-----                                     | 312 |
| V.vinifera1   | -----SGAAWGGAYDPNSHTQH-----                                    | 304 |
| B.distachyon  | -----FDTANAYQPHAAQASAYAGYSYGVVAGYAQ-----PSYPGTYAAPQHFV-        | 363 |
| HvTG221-like  | -----YDSATAYQ-----LQANAYASYSYGVVAGYAQ-----PNYPGTYAAPQHFV-      | 413 |
| O.sativa      | -----YDAATAYQMHAQAANAYAGYPYGVVAGYTAALPGYPSAYAAAPQPI-           | 353 |
| S.bicolor     | -----QAGAYTYAYDAATAYAYAGYSYGVV-----GYAQSVPNYS--YAVPPQP-        | 356 |
| TG221         | HISRPRLLGHISRPRLLGHISRGLSLGHISRPRLLGHISRPRMGHISRPRMGI-         | 456 |
|               |                                                                |     |
| G.max2        | -----GYD-----                                                  | 349 |
| G.max1        | -----AYDAPRAAGYDAQSRGVAG-PHGHPMNNMPYGSIT                       | 384 |
| V.vinifera2   | -----VYDAPRGTNYDAPTRAAPG-PHGQVPSGNNVYGSAT                      | 400 |
| R.communis2   | GYDVQRIPGYAPRIPGYDVQQGPHYDASRVAGYDPAARGTAVPPHGQMTANNVYGSAT     | 446 |
| A.lyrata      | -----PSNNTPYGSAA                                               | 353 |
| A.thaliana    | -----PSNNTPY                                                   | 349 |
| P.trichocarpa | -----                                                          |     |
| R.communis1   | -----                                                          |     |
| V.vinifera1   | -----                                                          |     |
| B.distachyon  | -----TSGTATDVICTYAVGSAGYPAGVVQPSTGAANAGQA                      | 400 |
| HvTG221-like  | -----ASGAATDATSAYGAAGSTGYPAAPVQASSGAANAGQA                     | 450 |
| O.sativa      | -----SSGVATDVASMYGAISSAGYPAGVVQSSSGAANAGQA                     | 390 |
| S.bicolor     | -----SSGATTEAASMYGAAGSAGYPTAQVQPSATANAAP                       | 393 |
| TG221         | -----SRVLRLEHTTMLMMLARLHMVTLAIQLQATRKVQC                       | 493 |
|               |                                                                |     |
| G.max2        | -----                                                          |     |
| G.max1        | PPARSGGGYEPA-RGVNPARR-----                                     | 404 |
| V.vinifera2   | PPARSGGGYEAPRGGNPVRR-----                                      | 421 |
| R.communis2   | PSTRAVSGYEAPRGGNPVRR-----                                      | 467 |
| A.lyrata      | -----TASARGNPSCR-----                                          | 364 |
| A.thaliana    | -----AGTHGNPSRR-----                                           | 359 |
| P.trichocarpa | -----                                                          |     |
| R.communis1   | -----                                                          |     |
| V.vinifera1   | -----                                                          |     |
| B.distachyon  | PPAP--PAPYPATYDPTRGAQR-----                                    | 420 |
| HvTG221-like  | P--PAPYPATYDPTKAAQR-----                                       | 467 |
| O.sativa      | P--ATYPVAYDPTRAGQR-----                                        | 406 |
| S.bicolor     | PPPPPPAAPYPSTYDQTRGAQR-----                                    | 415 |
| TG221         | PTIPLHLRSQAAVQLRTPQEAASMGLVVLDDILLGKFSRAVALQMRKHLLHHRQH        | 553 |



**Figure S5. Multiple sequence alignment of coding sequences of TGZ15, TGZ21 and Poaceae proteins.** Significant sequence similarity across the whole coding region is maintained, but lack of conserved guanosine in position 747 of the TGZ15 and TGZ21 cDNA (marked with black solid arrow) results in a frame shift. It preserves the Gly249 amino acid (encoded by GGA instead of GGG) but changes all the consecutive amino acids and extends the protein length with respect to other Poaceae sequences (see Fig.S4 for comparison).

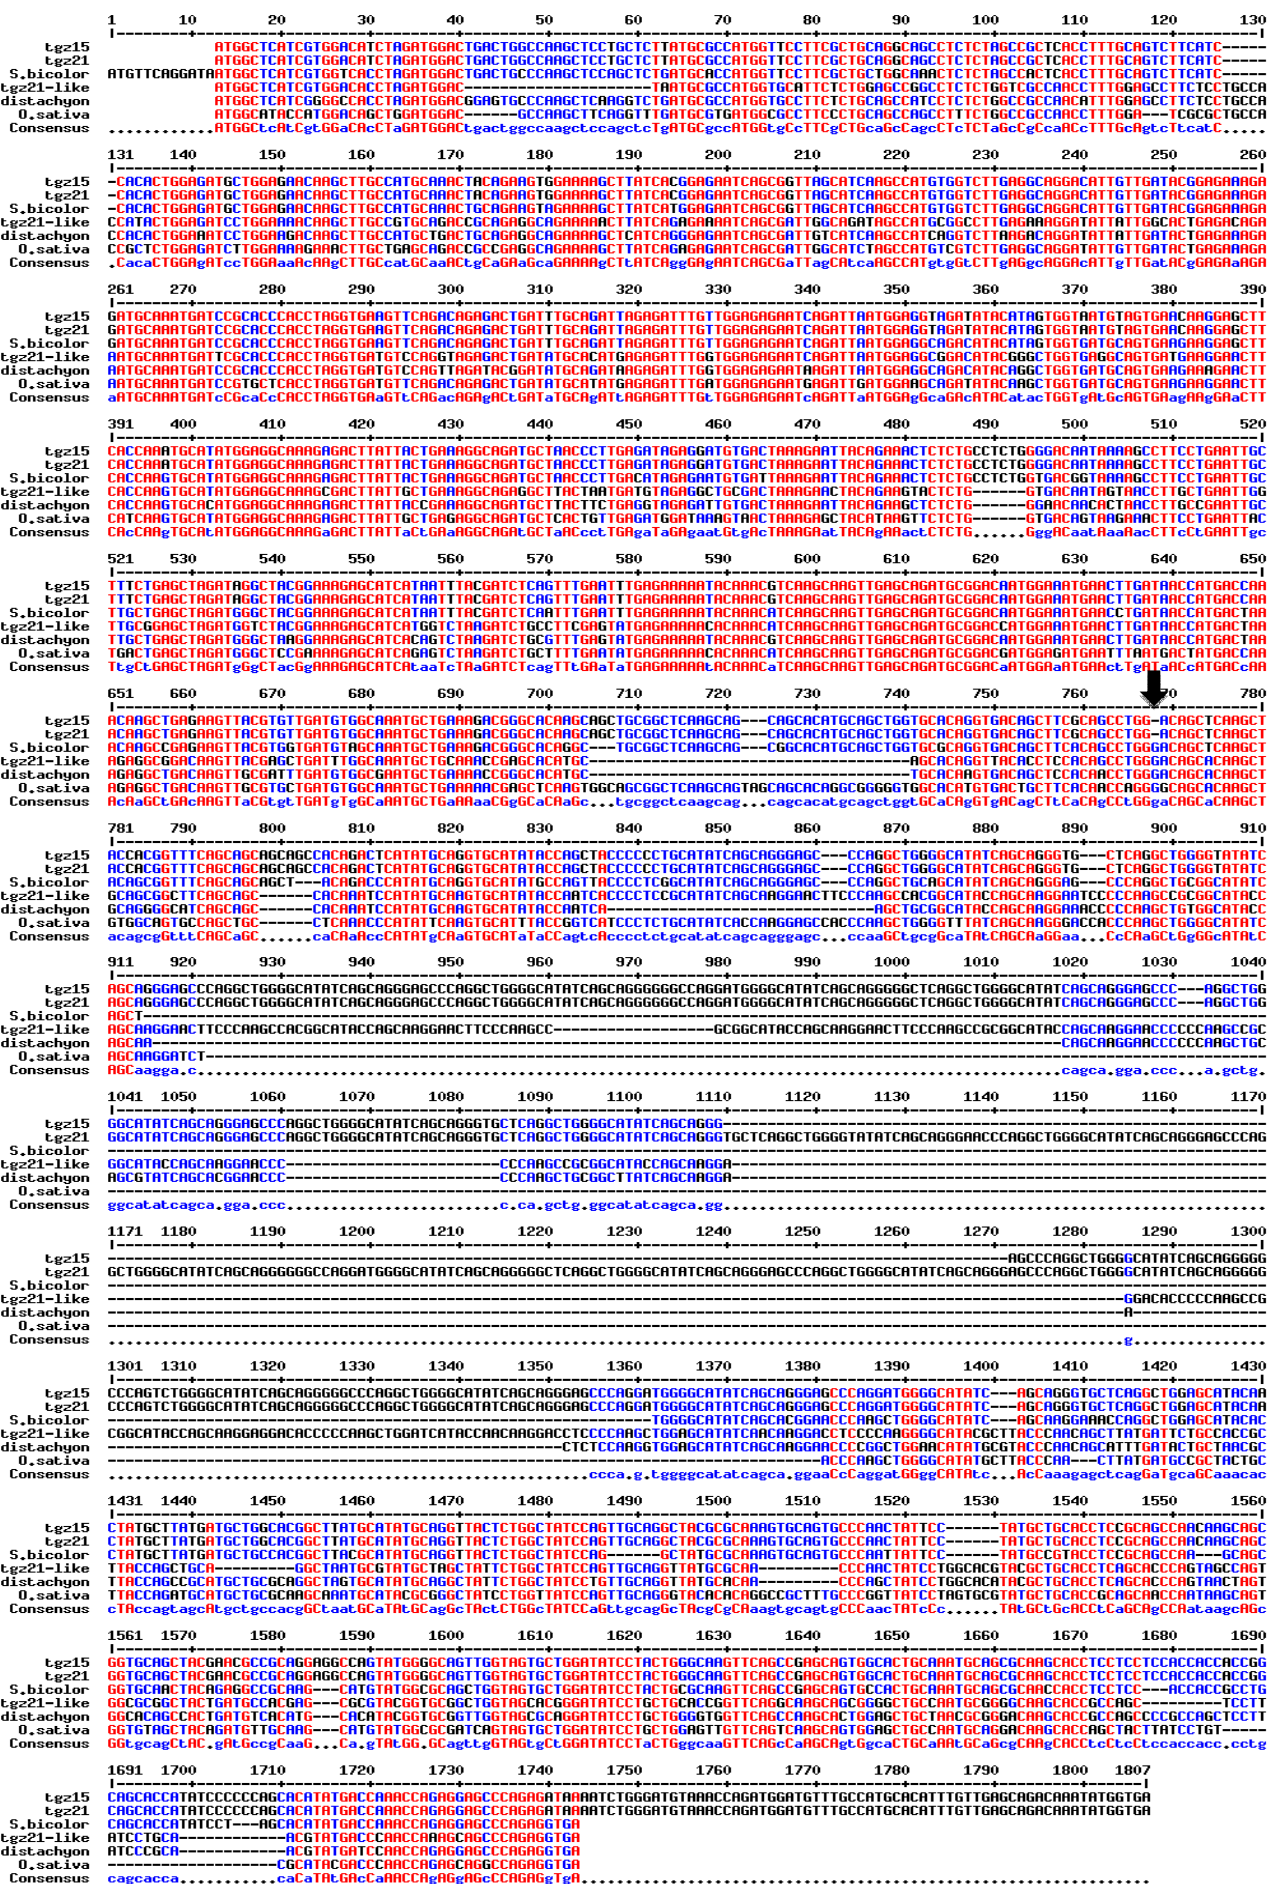

**Figure S6. Alignment of TGZ15 and TGZ21 115-nt fragments (704:818) with maize DNA sequences.** Sequences were retrieved by blastn search with the query cDNA fragment in the MaizeGDB database. AJ421525 and AJ488103 are TGZ15 and TGZ21 database records, respectively. chr2 is genomic DNA of maize chromosome 2.

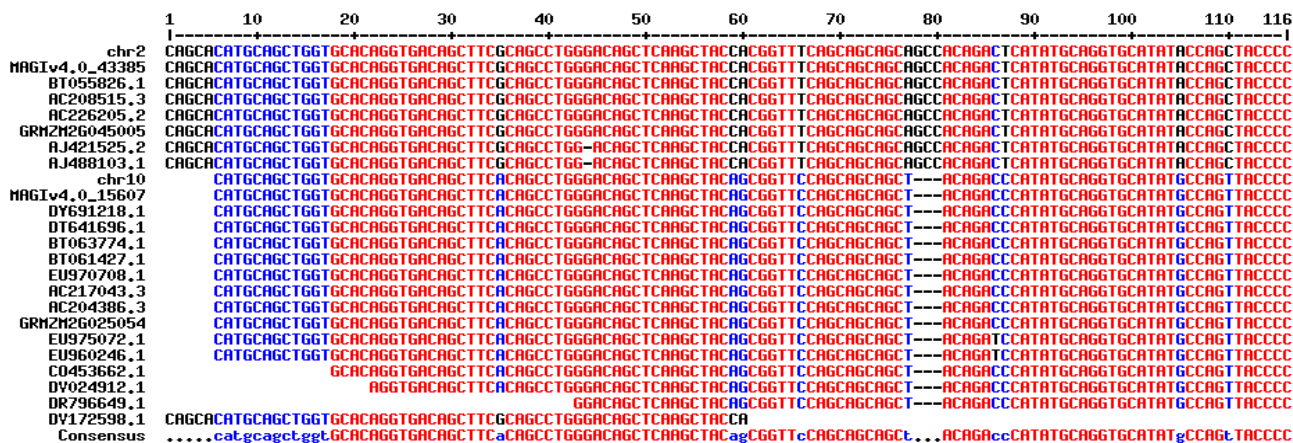

**Figure S7. Expression profile of *HvPng1-like* during barley development.** A. Comparison of 15 different barley tissue types representing barley developmental stages in two barley genotypes, Morex and Golden Promise. All data were generated in one experiment involving total 63 GeneChip hybridizations (Druka et al. 2006). B. General expression profile during barley development generated by meta-analysis of 1795 GeneChip hybridizations from multiple experiments.

A.

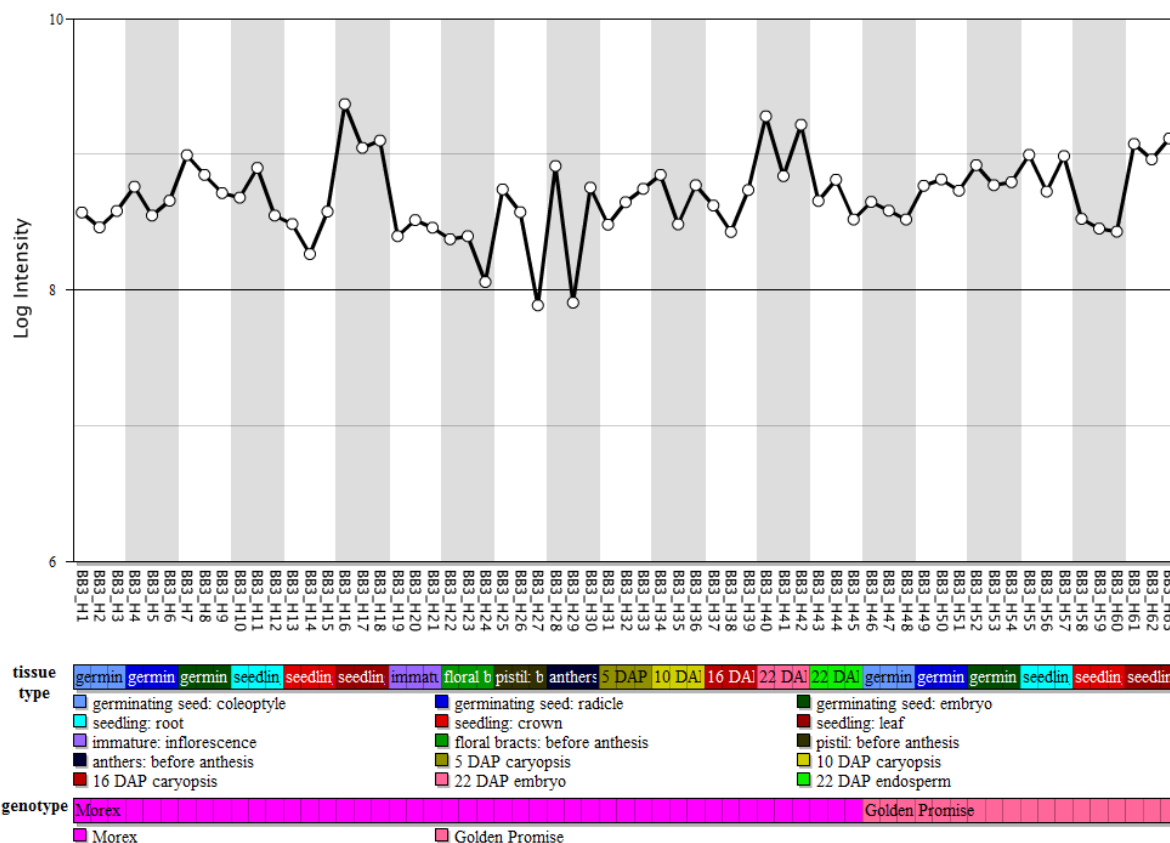

B.

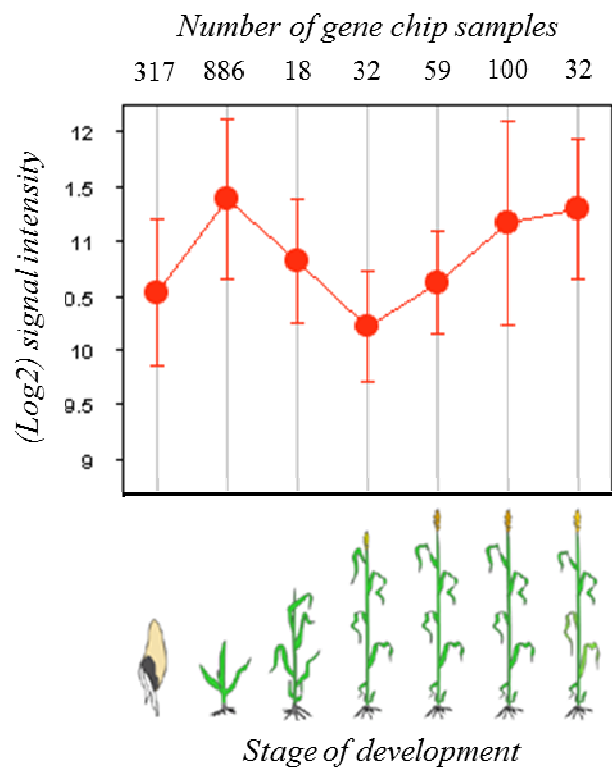

**Figure S8. Visual representation of variation for HvPng1-like transcript levels during barley leaves senescence, measured relative to day 0.** Data collected from 4 biological replicates, each replicate being a pool of about 30 plants. Whisker-box plots were generated with REST 2009 software.

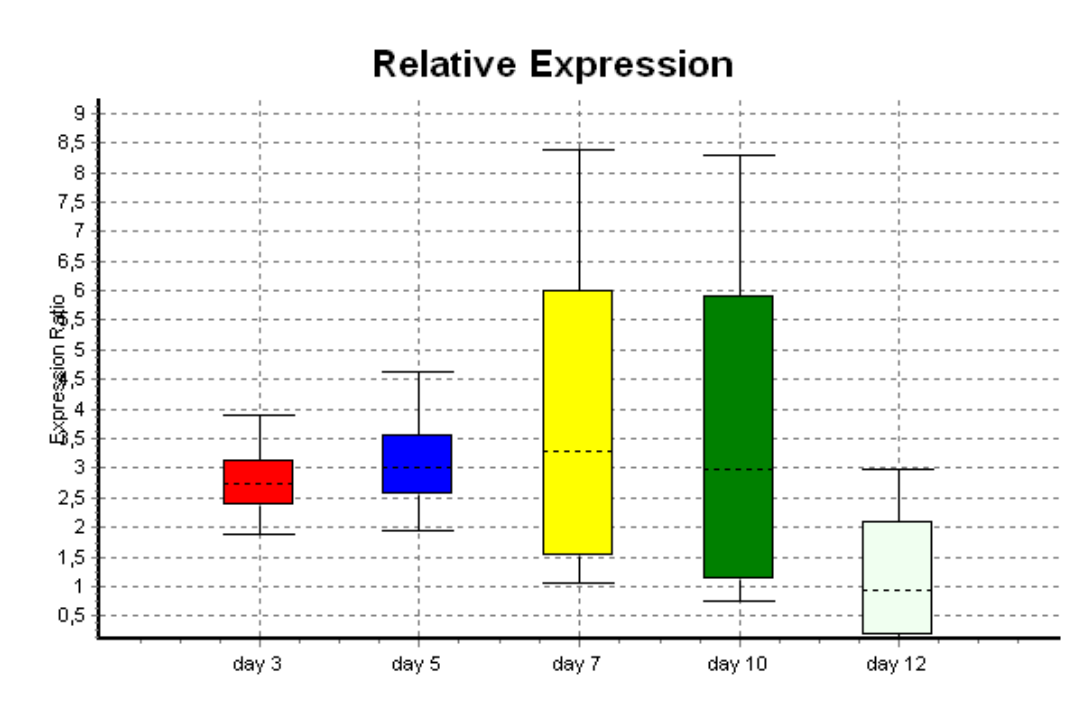

Supplement: 726_2014_1912_MOESM1_ESM.pdf [file 726_2014_1912_MOESM1_ESM.pdf]
